# Supplementary material for: Improved surgical resection of metastatic pancreatic cancer using uPAR targeted in vivo fluorescent guidance: comparison with traditional white light surgery
Source: PubMed Central journal article supplement (PMC6824874; doi:10.18632/oncotarget.27220), 2019-10-29
Supplement: oncotarget-10-6308-s001.pdf [file oncotarget-10-6308-s001.pdf]

# **Improved surgical resection of metastatic pancreatic cancer using uPAR targeted *in vivo* fluorescent guidance: comparison with traditional white light surgery**

## **SUPPLEMENTARY MATERIALS**

**Supplementary Video 1: Metastatic surgery guided by the fluorescent signal.** See Supplementary Video 1

**Supplementary Video 2: Localization of a primary pancreatic human xenograft tumor using our fluorescent probe together a da Vinci R HD Si robotic system.** See Supplementary Video 2
